1 **Increases in multiple resources promote plant invasion**

2 Zhijie Zhang<sup>1</sup>, Yanjie Liu<sup>2\*</sup>, Angelina Hardrath<sup>1</sup>, Huifei Jin<sup>2,3</sup>, Mark van Kleunen<sup>1,4</sup>

3

4 <sup>1</sup>Ecology, Department of Biology, University of Konstanz, 78464 Konstanz, Germany

5 <sup>2</sup>Key Laboratory of Wetland Ecology and Environment, Northeast Institute of Geography and  
6 Agroecology, Chinese Academy of Sciences, Changchun 130102, China

7 <sup>3</sup>University of Chinese Academy of Sciences, Beijing 100049, China

8 <sup>4</sup>Zhejiang Provincial Key Laboratory of Plant Evolutionary Ecology and Conservation,  
9 Taizhou University, Taizhou 318000, China

10

11 Emails:

12 Zhijie Zhang, [zhijie.zhang@uni-konstanz.de](mailto:zhijie.zhang@uni-konstanz.de)

13 Yanjie Liu, [liuyanjie@iga.ac.cn](mailto:liuyanjie@iga.ac.cn)

14 Angelina Hardrath, [angelina.hardrath@uni-konstanz.de](mailto:angelina.hardrath@uni-konstanz.de)

15 Huifei Jin, [jin\\_hui\\_fei@163.com](mailto:jin_hui_fei@163.com)

16 Mark van Kleunen, [mark.vankleunen@uni-konstanz.de](mailto:mark.vankleunen@uni-konstanz.de)

17 \* Corresponding author: [liuyanjie@iga.ac.cn](mailto:liuyanjie@iga.ac.cn), +86 431 82536096

18

19

20

21 **Authorship:** ZZ and YL conceived the idea. ZZ, YL and MvK designed the study. AH and  
22 HJ performed the experiment. ZZ led the analyses and writing, with inputs from YL and  
23 MvK.

24

- 25 **Data and code accessibility:** Should the manuscript be accepted, the data and code of the
- 26 study will be archived in Figshare and the DOI will be included at the end of the article.

27 **Abstract**

28           Invasion by alien plants is frequently attributed to increased resource availabilities.  
29 Still, our understanding is mainly based on effect of single resource. Despite the fact that  
30 plants rely on many resources, little is known about how multiple resources affect success of  
31 alien plants. Here, with two common garden experiments, one in China and one in Germany,  
32 we tested whether nutrient and light availabilities affected the competitive outcomes between  
33 alien and native plants. We found that under low resource availabilities or with addition of  
34 only one type of resources aliens were not more competitive than natives. However, with a  
35 joint increase of nutrients and light intensity, aliens outcompeted natives. Our finding  
36 indicates that addition of multiple resources could greatly reduce the number of limiting  
37 factors (i.e. niche dimensionality), and that this favors the dominance of alien species. It also  
38 indicates that habitats experiencing multiple global changes might be more vulnerable to  
39 plant invasion.

40

41 **Keywords:** light, niche, nutrient, plant invasion, resource competition

42

43

## 44 **Introduction**

45           The rapid accumulation of alien species is one of the characteristics of the  
46 Anthropocene<sup>1,2</sup>. Because some alien species can threaten native species and ecosystem  
47 functioning<sup>3</sup>, it has become an urgent quest to understand the mechanism whereby aliens  
48 outcompete natives. One widely considered mechanism is proposed by the fluctuating  
49 resource hypothesis<sup>4</sup>, which poses that ‘a plant community becomes more susceptible to  
50 invasion whenever there is an increase in the amount of unused resources’. Numerous studies  
51 have shown that resource increases can favor alien plants over natives<sup>5,6</sup>. However, while  
52 plants need different types of resources (e.g. nutrients and light), most studies investigated  
53 only one single resource, mainly nutrients. Therefore, it remains largely unknown whether  
54 multiple resources will interact to affect competitive outcomes between alien and native  
55 plants.

56           How resources affect competition has long fascinated and puzzled ecologists<sup>7,8</sup>.  
57 Resource-competition theory predicts that if multiple species are competing for resources,  
58 coexistence of all species is possible when each species is limited by a different resource<sup>9</sup>. A  
59 classic example comes from algae, where *Asterionella formosa* and *Cyclotella meneghiniana*  
60 were able to coexistence when *A. formosa* was limited by phosphate and *C. meneghiniana*  
61 was limited by silicate<sup>10</sup>. Resource addition (e.g. phosphate) will decrease the number of  
62 limiting resources and will thus favor dominance of one species (known as the niche-  
63 dimension hypothesis *sensu* Harpole & Tilman<sup>11</sup>). Although it remains challenging to identify  
64 limiting resources for more complex species (e.g. vascular plants), a few follow-up  
65 experiments have shown that coexistence of multiple plant species was less likely with  
66 addition of multiple resources<sup>11,12</sup>. The explanation behind this is straightforward: the more  
67 types of resources are added, the more likely it is that the previously limiting resources are no

68 longer limiting. A next step in this field of research is to predict which type of species will be  
69 favored with addition of multiple resources.

70 One group of species that might benefit from addition of multiple resources is alien  
71 species. First, most alien plants origin from human-associated habitats<sup>13</sup>, which are frequently  
72 rich in resources due to disturbance. Consequently, successful aliens are those that are pre-  
73 adapted to high resource availabilities and thus are favored by resource addition<sup>14,15</sup>. Second,  
74 aliens might be limited by fewer factors than natives are, because their evolutionary history  
75 differs from the one of natives<sup>16,17</sup>. Such advantage of aliens over natives may be invisible  
76 when both types of species suffer from resource limitation, especially from the limitation of  
77 multiple resources. However, the advantage will become noticeable when resource limitation  
78 is removed by resource addition. Although resource-competition theory offers a potential  
79 mechanistic explanation of the success of alien species, empirical test remains rare.

80 Here, we conducted two experiments, one in Germany and one in China, with similar  
81 designs. In both locations, we grew multiple alien and native plant species  
82 either alone, in monoculture, or in mixture of two species. To vary resource availabilities, we  
83 used two levels of nutrients, and two levels of light. We aimed to test whether resource  
84 availabilities affected pairwise competitive outcomes between alien and native species. We  
85 expected that 1) an increase in resource favors aliens over natives, and 2) that this effect is  
86 stronger when two resources instead of one resource is added.

## 87 **Methods and Materials**

### 88 **Study species**

89 To increase our ability to generalize the results, we conducted multispecies  
90 experiments<sup>18</sup>. For the experiment in China, we selected 8 species that are either native or  
91 alien in China (Table S1). For the experiment in Germany, we selected 16 species that are  
92 either native or alien in Germany (Table S1). All 24 species, representing seven families, are  
93 common in their respective regions. All alien species are naturalized (*sensu* Richardson *et*  
94 *al*<sup>19</sup>) in the country where the respective experiment was conducted. We classified the species  
95 as naturalized alien or native to China or Germany based on the following databases: (1)  
96 “The Checklist of the Alien Invasive Plants in China”<sup>20</sup>, (2) the Flora of China  
97 ([www.efloras.org](http://www.efloras.org)) and (3) BiolFlor ([www.ufz.de/biolflor](http://www.ufz.de/biolflor)). Seeds or stem fragments of the  
98 study species were obtained from botanical gardens, commercial seed companies, or from  
99 wild populations (Table S1).

### 100 **Experimental set-up**

#### 101 *The experiment in China*

102 From 21 May to 27 June 2020, we planted or sowed the eight study species into  
103 plastic trays filled with potting soil (Pindstrup Plus, Pindstrup Mosebrug A/S, Denmark). To  
104 ensure that the species were in similar developmental stages at the beginning of the  
105 experiment, we sowed the species at different times (Table S1). Three species were grown  
106 from stem fragments because they mainly rely on clonal propagation, and the others were  
107 sown as seeds (Table S1).

108 On 13 July 2020, we transplanted the seedlings into 2.5-L pots filled with a mixture of  
109 sand and vermiculite (1:1 v/v). Three competition treatments were imposed: 1) no  
110 competition, in which plants were grown alone; 2) intraspecific competition, in which two  
111 individuals of the same species were grown together; 3) interspecific competition, in which

112 two individuals, each from another species were grown together. We grew all eight species  
113 without competition, in intraspecific competition and in all 28 possible pairs of interspecific  
114 competition. For the no-competition and intraspecific-competition treatments, we replicated  
115 each species seven times. For the interspecific-competition treatment, for which we had many  
116 pairs of species, we replicated each pair two times.

117         The experiment took place in a greenhouse at the Northeast Institute of Geography  
118 and Agroecology, Chinese Academy of Sciences (Changchun, China). The greenhouse had  
119 transparent film on the top, which reduced the ambient light intensity by 12%. It was open on  
120 the side, so that insects and other organisms can enter. To vary nutrient availabilities, we  
121 applied to each pot either 5g (low nutrient treatment) or 10g (high nutrient treatment) of a  
122 slow-release fertilizer (Osmocote® Exact Standard, Everris International B.V., Geldermalsen,  
123 The Netherlands). To vary light availabilities, we used two cages (size: 9 × 4.05 × 1.8 m).  
124 One of them was covered with two layers of black netting material, which reduced the light  
125 intensity by 71% (low light-intensity treatment). The other was left uncovered (high light-  
126 intensity treatment).

127         The experiment totaled 672 pots ([8 no-competition × 7 replicates + 8 intraspecific-  
128 competition × 7 replicates + 28 interspecific-competition × 2 replicates] × 2 nutrient  
129 treatments × 2 light treatments). The pots were randomly assigned to positions, and were  
130 randomized once on 15 August within the block (low or high light-intensity treatment). We  
131 watered the plants daily to avoid water limitation. On 1 September 2020, we harvested  
132 aboveground biomass of all plants. The biomass was dried at 65°C for 72h to constant weight,  
133 and then weighed to the nearest 1mg.

#### 134 *The experiment in Germany*

135         On 15 June 2020, we sowed seeds of the 16 species into plastic trays filled with  
136 potting soil (Topferde, Einheitserde Co). On 6 July 2020, we transplanted the seedlings into

137 1.5-L pots filled with a mixture of potting soil and sand (1:1 v/v). Like the experiment in  
138 China, we imposed three competition treatments: no competition, intraspecific competition  
139 and interspecific competition. However, in this experiment, which had two times more  
140 species than the experiment in China, we only included 24 randomly chosen species pairs for  
141 the interspecific-competition treatment, and all of these pairs consisted of one alien and one  
142 native species. For the no-competition treatments, we replicated each species two times. For  
143 the competition treatments, we did not use replicates for any of the species combinations, as  
144 replication of the competition treatments was provided by the large number of species pairs.

145         The experiment took place outdoors in the Botanical Garden of the University of  
146 Konstanz (Konstanz, Germany). To vary nutrient availabilities, we applied once a week, to  
147 each pot either 100 ml of a low-concentration liquid fertilizer (low-nutrient treatment; 0.5‰  
148 Universol ® Blue oxide fertilizer) or 100 ml of a high-concentration of the same liquid  
149 fertilizer (high nutrient treatment; 1‰). To vary light availabilities, we used eight metal wire  
150 cages (size: 2 × 2 × 2 m). Four of the cages were covered with one layer of white and one  
151 layer of green netting material, which reduced the ambient light intensity by 84% (low light-  
152 intensity treatment). The remaining four cages were covered only with one layer of the white  
153 netting material, which served as positive control (to control for the effect of netting) and  
154 reduced light intensity by 53% (high light-intensity treatment). In other words, the low light-  
155 intensity treatment received 66% less light than the high light-intensity treatment.

156         The experiment totaled 320 pots ([16 no-competition × 2 replicates + 16 intraspecific-  
157 competition + 32 interspecific-competition] × 2 nutrient treatments × 2 light treatments). The  
158 eight cages were random assigned to fixed positions in the botanical garden. The pots were  
159 randomly assigned to the eight cages (40 pots in each cage), and were re-randomized once  
160 within and across cages of the same light treatment on 3 August. Besides the weekly  
161 fertilization, we watered the plants two or three times a week to avoid water limitation. On 7



162 and 8 September 2020, we harvested aboveground biomass of all plants. The biomass was  
163 dried at 70°C for 96h to constant weight, and then weighed to the nearest 0.1 mg.

#### 164 **Statistical analyses**

165 All analyses were performed using R version 3.6.1<sup>21</sup>. To test whether resource  
166 availabilities affected competitive outcomes between alien and native species, we applied  
167 linear mixed-effects models to analyze the two experiments jointly and separately, using the  
168 *nlme* package<sup>22</sup>. For the model used to analyze the two experiments jointly, we excluded  
169 interspecific competition between two aliens and between two natives from the experiment in  
170 China, because these combinations were not included in the experiment in Germany. When  
171 we analyzed each experiment separately, the results were overall similar to the result of the  
172 joint analysis. Therefore, we focus in the manuscript on the joint analysis, and present the  
173 results of the separate analyses in Supplement S1.

174 In the model, we included aboveground biomass as response variable. Because plant  
175 mortality was low and mainly happened after transplanting, we excluded pots in which plants  
176 had died. We included origin of the species (alien or native), competition treatment (see  
177 below for details), nutrient treatment, light treatment and their interactions as fixed effects;  
178 and study site (China or Germany), and identity and family of the species as random effects.  
179 In addition, we allowed each species to respond differently to the nutrient and light  
180 treatments (i.e. we included random slopes). To account for pseudoreplication<sup>23</sup>, we also tried  
181 to include cages as random block effect and pots as random effect. However, the cages  
182 explained very little variation and did not change the results qualitatively, most likely because  
183 we re-randomized plants across cages of the same treatment in Germany, and because  
184 environmental differences between cages were small. The pots explained very little variation  
185 as well. Therefore, we removed cages and pots from the final model to reduce model  
186 complexity. To improve normality of the residuals, we natural-log-transformed aboveground

187 biomass. To improve homoscedasticity of residuals, we allowed the species and competition  
188 treatment to have different variances by using the *varComb* and *varIdent* functions<sup>24</sup>.  
189 Significances of the fixed effects were assessed with ANOVA.

190 A significant effect of origin would indicate that alien and native species differed in  
191 their biomass production, across all competition and resource-availability (light and nutrients)  
192 treatments. This would tell us the competitive outcome between aliens and natives across  
193 different resource availabilities. ‘Competitive outcome’ here refers to which species will  
194 exclude or dominate over the other species at the end point for the community<sup>25,26</sup>. For  
195 example, an overall higher level of biomass production of alien species would indicate that  
196 aliens would dominate when competing with natives. A significant interaction between  
197 resource-availability treatment and origin of the species would indicate that resource  
198 availabilities affect the biomass production of alien and native species differently, averaged  
199 across all competition treatments. In other words, it would indicate that resource availabilities  
200 affect the competitive outcome between aliens and natives. A significant interaction between  
201 a resource-availability treatment and the competition treatment would indicate that resource  
202 availabilities affect the effect of competition (e.g. no competition *vs.* competition).

203 In the competition treatment, we had three levels: 1) no competition, 2) intraspecific  
204 competition, and 3) interspecific competition between alien and native species. To split them  
205 into two contrasts, we created two dummy variables<sup>27</sup> testing 1) the effect of competition, and  
206 2) the difference between intra- and interspecific competition.

## 207 **Results**

208 Overall, biomass production of plants increased with nutrients (+66.6%; Fig. 1; Table  
209 S2;  $F_{1,1156} = 46.71$ ,  $P < 0.001$ ), and increased with light intensity (+67.9%;  $F_{1,1156} = 9.73$ ,  $P =$   
210 0.002). Moreover, biomass production increased the most with a joint increase of nutrients  
211 and light intensity (+79.4%), as indicated by the interaction between nutrient and light  
212 treatments ( $F_{1,1156} = 23.15$ ,  $P < 0.001$ ). Across competition treatments and the different light  
213 and nutrient treatments, alien and native species did not differ in their biomass production  
214 ( $F_{1,1156} = 1.95$ ,  $P = 0.163$ ). This indicates that, overall, aliens did not outcompete natives.  
215 However, this competitive outcome between aliens and natives was affected by the  
216 interaction between nutrient and light treatments (Fig. 1; Table S2;  $F_{1,1156} = 4.30$ ,  $P = 0.038$ ).  
217 More specifically, with a joint increase of nutrients and light intensity, aliens produced more  
218 (+110.8%) biomass than natives; whereas this difference was much smaller under low  
219 resource availabilities (+48.3%) or with addition of only one type of resources (+48.4% under  
220 only high nutrients; +68.9% under only high light intensity).

221 Competition reduced (-26.0%) biomass production, as indicated by the difference  
222 between plants grown without competition and plants with competition (Fig. 2; Table S2;  
223  $F_{1,1156} = 2.00$ ,  $P = 0.158$ ). Although this effect of competition was not statistically significant  
224 across different nutrient or light treatments, it became more apparent with increased nutrients  
225 ( $F_{1,1156} = 5.71$ ,  $P = 0.017$ ) and increased light intensity ( $F_{1,1156} = 4.99$ ,  $P = 0.026$ ). In addition,  
226 we found that plants produced more (+16.4%) biomass when competing with interspecific  
227 competitors than with intraspecific competitors (Fig. 2; Table S2;  $F_{1,1156} = 20.26$ ,  $P < 0.001$ ).

## 228 **Discussion**

229           We found that under low resource availabilities, alien and native plants did not differ  
230 in biomass production, indicating that under those conditions aliens will not outcompete  
231 natives. Although an increase in one type of resource, either nutrients or light, increased  
232 biomass production; it affected aliens and natives similarly, and thus did not change the  
233 potential competitive outcome. However, with a joint increase of nutrients and light intensity,  
234 aliens produced more biomass than natives, indicating that aliens will outcompete natives  
235 under high availabilities of both resources. Our finding thus supports the fluctuating resource  
236 hypothesis, which predicts that ‘a plant community becomes more susceptible to invasion  
237 whenever there is an increase in the amount of unused resources’. Furthermore, our finding,  
238 along with those of others<sup>14,28</sup>, explains why plant invasion is frequently associated with  
239 disturbance. This is because disturbance could increase nutrient availability and create open  
240 patches with a higher light intensity, a combination that favors naturalized alien plants.

241           Our finding that across two experiments, addition of one type of resource did not  
242 favor alien plants has several implications. First, it suggests that plants —irrespective of  
243 their origin— are limited by multiple factors, such as nutrients, light and herbivory. In other  
244 words, niche space has multiple dimensions, each of which is represented by one limiting  
245 factor. While addition of one resource removes one dimension from the niche space, the  
246 remaining dimensions could still limit both alien and native plants, maintaining coexistence  
247 of aliens and natives. Some previous studies, in line with our finding, showed that addition of  
248 one type of resource (nutrients) did not favor alien plants<sup>6</sup>. However, others found that  
249 addition of only nutrients was sufficient to favor alien plants<sup>5,15</sup>. One explanation for the  
250 apparent discrepancy could be that the latter studies were conducted under high light  
251 conditions. This was likely the case as the latter two studies were done in summer, while Liu  
252 *et al.*<sup>6</sup> was done in a greenhouse in winter. With addition of nutrients, their environments

253 were similar to joint increases of nutrients and light in our study, which reduced more  
254 dimensions of the niche space, favoring dominance by one of the two species.

255 A second implication is that our finding suggests that alien and native species did not  
256 strongly differ in their competitive abilities for nutrients or light. As addition of one resource  
257 removes one dimension from the niche space, it intensifies competition for other dimensions.  
258 For example, nutrient addition can intensify light competition<sup>29</sup>, which is also indicated by  
259 our finding that competition was more severe with nutrient addition (Fig. 2a). Consequently,  
260 if alien plants have stronger competitive abilities for light (e.g. have a lower minimum  
261 requirement of light) than natives, they will dominate with nutrient addition. However, as this  
262 was not the case, we conclude that there was no strong difference in competitive abilities for  
263 light between the aliens and natives.

264 The two implications mentioned above raise the question which factor or factors  
265 determine the higher competitiveness of naturalized alien plants with joint increases of  
266 nutrients and light. One potential factor could be plant enemies. Because the evolutionary  
267 histories of alien plants differ from those of the native plants, alien plants might be released  
268 from natural enemies<sup>30</sup>. This advantage might be stronger when other factors, for example,  
269 resource availabilities, are not limiting the plants<sup>31,32</sup>. An alternative potential factor is  
270 preadaptation of naturalized alien plants. Many alien plants occur in human-associated  
271 habitats<sup>13</sup>, where resource availabilities are high due to human disturbance. Consequently, of  
272 the many alien plants that have been introduced the ones that managed to naturalize or  
273 become invasive are most likely the ones that were selected for high growth rates under high  
274 resource availabilities. Given that these two explanations are not mutually exclusive, future  
275 studies that test their relative importance are needed.

276 **Conclusions**

277           The fluctuating resource hypothesis suggests that a plant community becomes more  
278 susceptible to invasion with additional resources. Our study suggests that this is particularly  
279 the case with increases of multiple resources, as this could greatly reduce the dimensionality  
280 of niche space, leading to competitive exclusion of one of the species. This can also explain  
281 why many studies have found that biological invasions are more frequent in disturbed, high  
282 resource environments.

283

284 **Acknowledgements**

285           We thank O. Ficht, M. Fuchs, X. Zhang, L. Wang and Y. Li for practical assistance.  
286 ZZ acknowledges funding from the China Scholarship Council (201606100049) and support  
287 from the International Max Planck Research School for Organismal Biology. YL  
288 acknowledges funding from the Chinese Academy of Sciences (Y9B7041001).

## 289 References

- 290 1 van Kleunen, M. *et al.* Global exchange and accumulation of non-native  
291 plants. *Nature* **525**, 100-103 (2015).
- 292 2 Lewis, S. L. & Maslin, M. A. Defining the Anthropocene. *Nature* **519**,  
293 171-180 (2015).
- 294 3 Vilà, M. *et al.* Ecological impacts of invasive alien plants: a meta-  
295 analysis of their effects on species, communities and ecosystems. *Ecology*  
296 *Letters* **14**, 702-708 (2011).
- 297 4 Davis, M. A., Grime, J. P. & Thompson, K. Fluctuating resources in plant  
298 communities: a general theory of invasibility. *Journal of Ecology* **88**,  
299 528-534 (2000).
- 300 5 Parepa, M., Fischer, M. & Bossdorf, O. Environmental variability  
301 promotes plant invasion. *Nature communications* **4**, 1604 (2013).
- 302 6 Liu, Y., Zhang, X. & van Kleunen, M. Increases and fluctuations in  
303 nutrient availability do not promote dominance of alien plants in synthetic  
304 communities of common natives. *Functional Ecology* **32**, 2594-2604  
305 (2018).
- 306 7 Hutchinson, G. E. The Paradox of the Plankton. *The American Naturalist*  
307 **95**, 137-145 (1961).
- 308 8 Chesson, P. Mechanisms of maintenance of species diversity. *Annual*  
309 *Review of Ecology and Systematics* **31**, 343-366 (2000).
- 310 9 Tilman, D. *Resource competition and community structure*. (Princeton  
311 University Press, 1982).
- 312 10 Tilman, D. Resource Competition between Plankton Algae: An  
313 Experimental and Theoretical Approach. *Ecology* **58**, 338-348 (1977).
- 314 11 Harpole, W. S. & Tilman, D. Grassland species loss resulting from  
315 reduced niche dimension. *Nature* **446**, 791-793 (2007).
- 316 12 Harpole, W. S. *et al.* Addition of multiple limiting resources reduces  
317 grassland diversity. *Nature* **537**, 93-96 (2016).
- 318 13 Kalusová, V. *et al.* Naturalization of European plants on other continents:  
319 The role of donor habitats. *Proceedings of the National Academy of*  
320 *Sciences* **114**, 13756-13761 (2017).
- 321 14 Seabloom, E. W. *et al.* Plant species' origin predicts dominance and  
322 response to nutrient enrichment and herbivores in global grasslands.  
323 *Nature communications* **6**, 7710 (2015).
- 324 15 Liu, Y. & van Kleunen, M. Responses of common and rare aliens and  
325 natives to nutrient availability and fluctuations. *Journal of Ecology* **105**,  
326 1111-1122 (2017).
- 327 16 Darwin, C. *On the origin of species*. (J. Murray, 1859).
- 328 17 Saul, W.-C., Jeschke, J. & Heger, T. The role of eco-evolutionary  
329 experience in invasion success. *NeoBiota* **17**, 57-74 (2013).

- 330 18 van Kleunen, M., Dawson, W., Bossdorf, O. & Fischer, M. The more the  
331 merrier: Multi-species experiments in ecology. *Basic and Applied*  
332 *Ecology* **15**, 1-9 (2014).
- 333 19 Richardson, D. M. *et al.* Naturalization and invasion of alien plants:  
334 concepts and definitions. *Diversity and Distributions* **6**, 93-107 (2000).
- 335 20 Ma, J. & Li, H. *The checklist of the alien invasive plants in China*.  
336 (Higher Education Press, 2018).
- 337 21 *R: A language and environment for statistical computing* (R Foundation  
338 for Statistical Computing, Vienna, Austria. Available at: [http://www.R-](http://www.R-project.org/)  
339 [project.org/](http://www.R-project.org/). 2019).
- 340 22 Pinheiro, J., Bates, D., DebRoy, S., Sarkar, D. & R Core Team. nlme:  
341 Linear and nonlinear mixed effects models. *R package version* **3**, 57  
342 (2018).
- 343 23 Hurlbert, S. H. Pseudoreplication and the design of ecological field  
344 experiments. *Ecological Monographs* **54**, 187-211 (1984).
- 345 24 Zuur, A., Ieno, E., Walker, N., Saveliev, A. & Smith, G. Mixed effects  
346 models and extensions in ecology with R. Gail M, Krickeberg K, Samet  
347 JM, Tsiatis A, Wong W, editors. *New York, NY: Spring Science and*  
348 *Business Media* (2009).
- 349 25 Gibson, D., Connolly, J., Hartnett, D. & Weidenhamer, J. Designs for  
350 greenhouse studies of interactions between plants. *Journal of Ecology* **87**,  
351 1-16 (1999).
- 352 26 Zhang, Z., Liu, Y., Brunel, C. & van Kleunen, M. Soil-microorganism-  
353 mediated invasional meltdown in plants. *Nature Ecology & Evolution* **4**,  
354 1612-1621 (2020).
- 355 27 Schielzeth, H. Simple means to improve the interpretability of regression  
356 coefficients. *Methods Ecol. Evol.* **1**, 103-113 (2010).
- 357 28 Liu, Y. *et al.* Do invasive alien plants benefit more from global  
358 environmental change than native plants? *Glob Chang Biol* (2016).
- 359 29 Hautier, Y., Niklaus, P. A. & Hector, A. Competition for light causes  
360 plant biodiversity loss after eutrophication. *Science* **324**, 636-638 (2009).
- 361 30 Keane, R. M. & Crawley, M. J. Exotic plant invasions and the enemy  
362 release hypothesis. *Trends in Ecology & Evolution* **17**, 164-170 (2002).
- 363 31 Coley, P. D., Bryant, J. P. & Chapin, F. S. Resource availability and plant  
364 antiherbivore defense. *Science* **230**, 895-899 (1985).
- 365 32 Blumenthal, D. M. Interactions between resource availability and enemy  
366 release in plant invasion. *Ecology Letters* **9**, 887-895 (2006).
- 367  
368



369 **Figures**

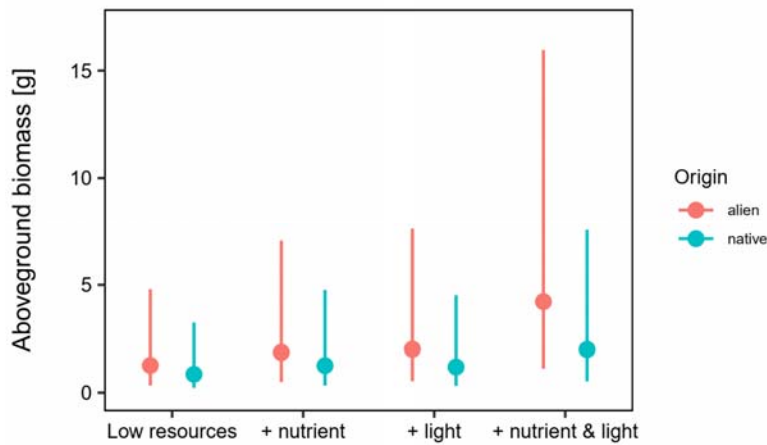

370

371 **Figure 1** Effects of nutrient and light availabilities on competitive outcomes between alien  
372 (red) and native (blue) plants. Competitive outcome is indicated by the difference in average  
373 biomass production. For example, a higher biomass production of alien plants indicates that  
374 aliens outcompete natives. Error bars indicate 95% CIs.

375

376

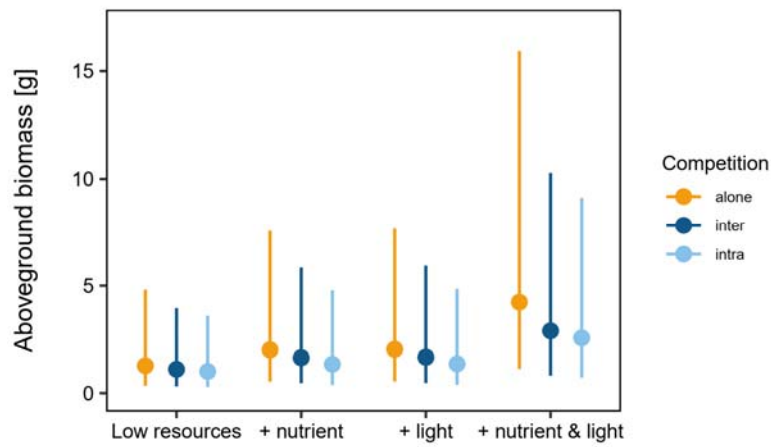

377

378 **Figure 2** Effects of nutrient and light availabilities on competition. Yellow, dark blue and  
379 light blue lines represent plants without competition, and with inter- and intraspecific  
380 competition, respectively. Error bars indicate 95% CIs.

381
